# Supplementary material
Source: publisher site journal article supplement (https://www.dovepress.com/article/265327)
Supplement: Supplementary file 1 [file get_supplementary_file.php]

Figure S1

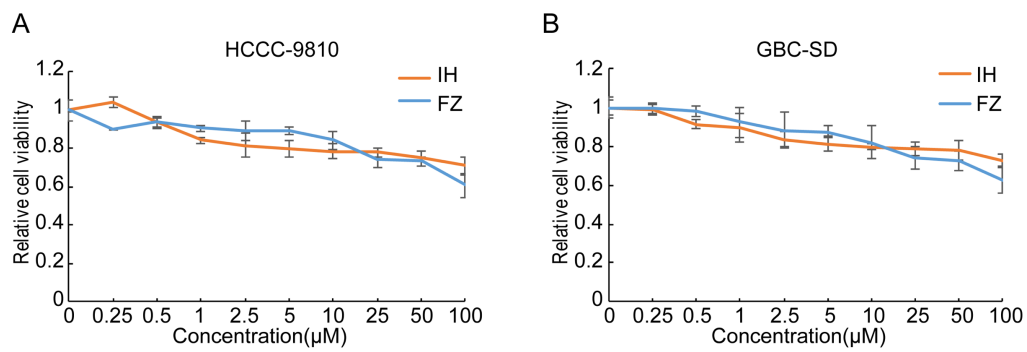

**Figure S1:** The effects of icotinib hydrochloride (IH) and fluzoparib (FZ) on cell proliferation of HCCC-9810 and GBC-SD cell lines. (A and B) The HCCC-9810 and GBC-SD cell lines were exposed to different concentrations of IH or FZ (0-100  $\mu\text{M}$ ), and cultured for 24 hours. Cell viability was evaluated by CCK-8 assay for cell proliferation analysis. Data represent the mean  $\pm$  SD of triplicate samples from at least two independent experiments.
